# Supplementary material for: Requirements for Human Respiratory Syncytial Virus Glycoproteins in Assembly and Egress from Infected Cells
Source: Hindawi journal article supplement (doi:10.1155/2011/343408), 2011-01-01
Supplement: f1 [file 343408.f1.pdf]

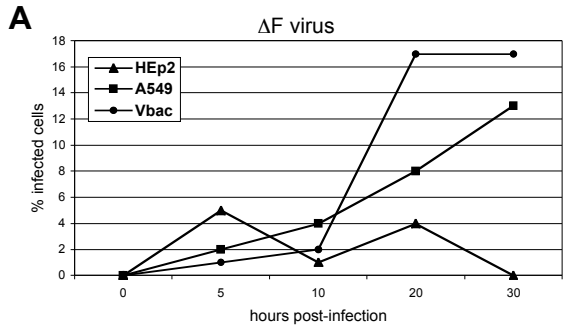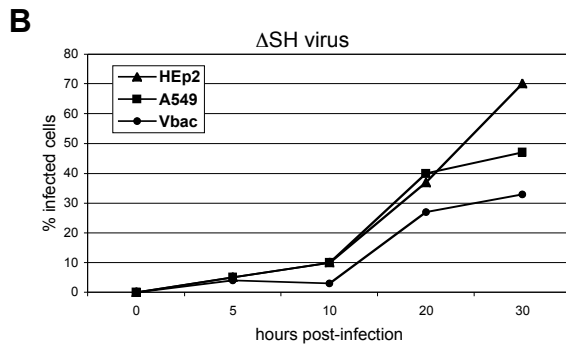

1

2

3 Supplemental figure 1. Comparison of infectivity rates of HRSV with and without F  
 4 glycoprotein in different cell types. Cells were infected with engineered HRSV  
 5 containing GFP and either with or without the F glycoprotein ( $\Delta SH$  and  $\Delta F$ , respectively)  
 6 at a MOI 0.2. Infected cells were observed at 0, 5, 10, 20, and 30 hours post-infection  
 7 and the percent of GFP expressing cells was recorded. (A) HEp2, A549, and Vbac cells  
 8 infected with  $\Delta F$  HRSV. (B) HEp2, A549, and Vbac cells infected with  $\Delta SH$  HRSV.
